# Supplementary material for: Chemoselective hydration of nitriles to amides using hydrated ionic liquid (IL) tetrabutylammonium hydroxide (TBAH) as a green catalyst
Source: Royal Society of Chemistry journal article supplement (doi:10.1039/c4ra09864a), 2014-12-17

## Supplementary Information

### Chemoselective hydration of nitriles to amides by hydrated ionic liquid (IL) tetrabutylammonium hydroxide (TBAH) as a green catalyst

Hojat Veisi,<sup>a,\*</sup> Behrooz Maleki,<sup>b,\*</sup> Mona Hamelian,<sup>a</sup> Samaneh Sedigh Ashrafi<sup>b</sup>

<sup>a</sup>Department of Chemistry, Payame Noor University, Tehran 19395-4697, Iran

[hojatveisi@yahoo.com](mailto:hojatveisi@yahoo.com)

<sup>b</sup>Department of Chemistry, Hakim Sabzevari University, Sabzevar 96179-76487, Iran

[b.maleki@hsu.ac.ir](mailto:b.maleki@hsu.ac.ir)

Tel: +98-51-44013324; Fax: +98-51-4401300

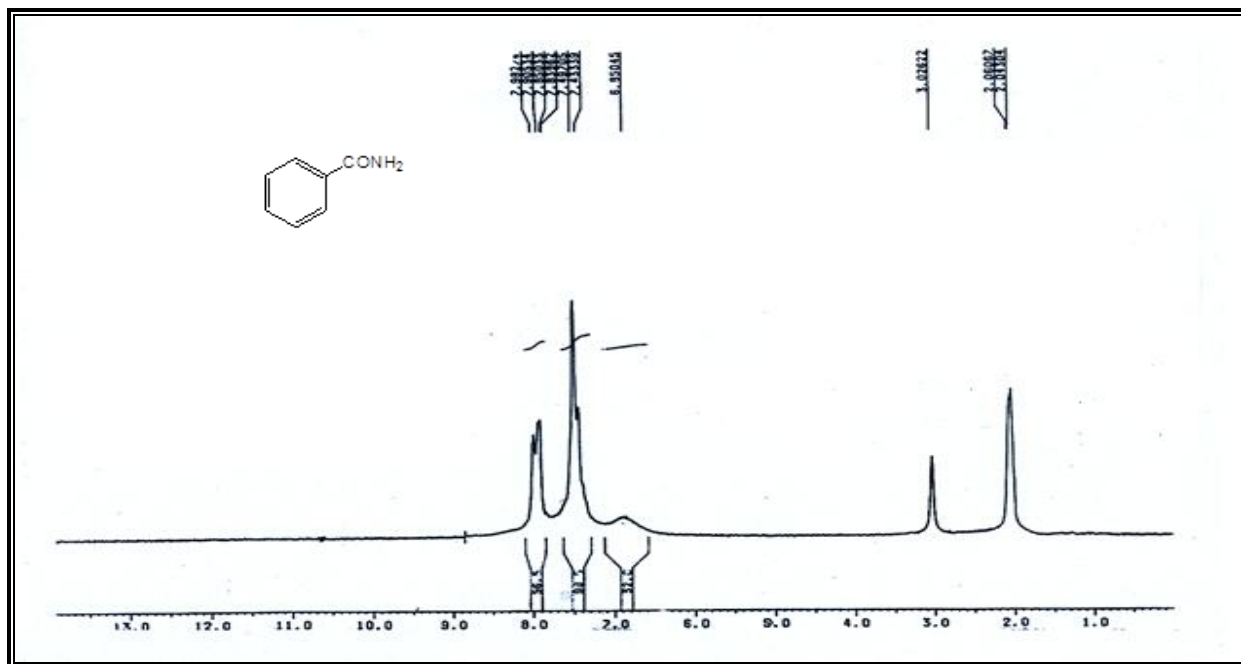

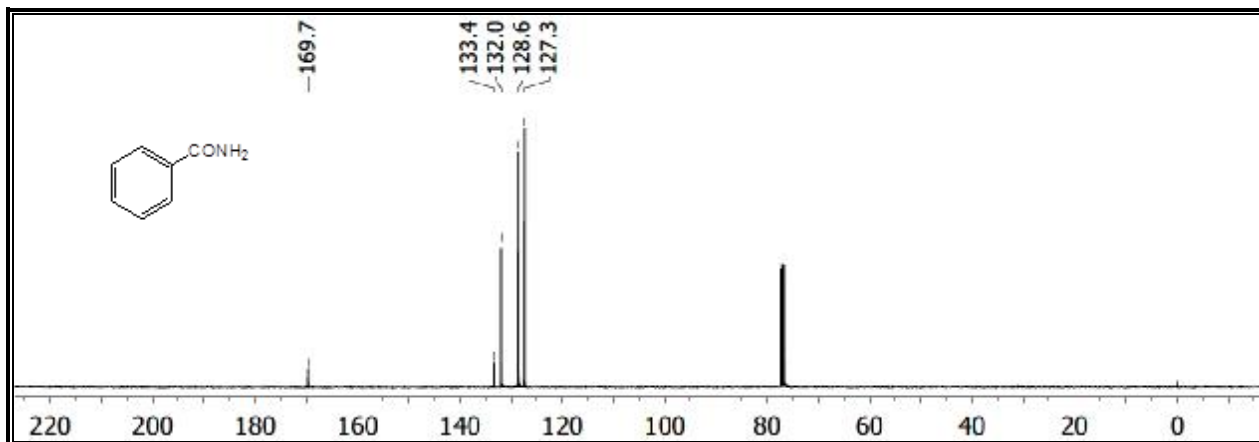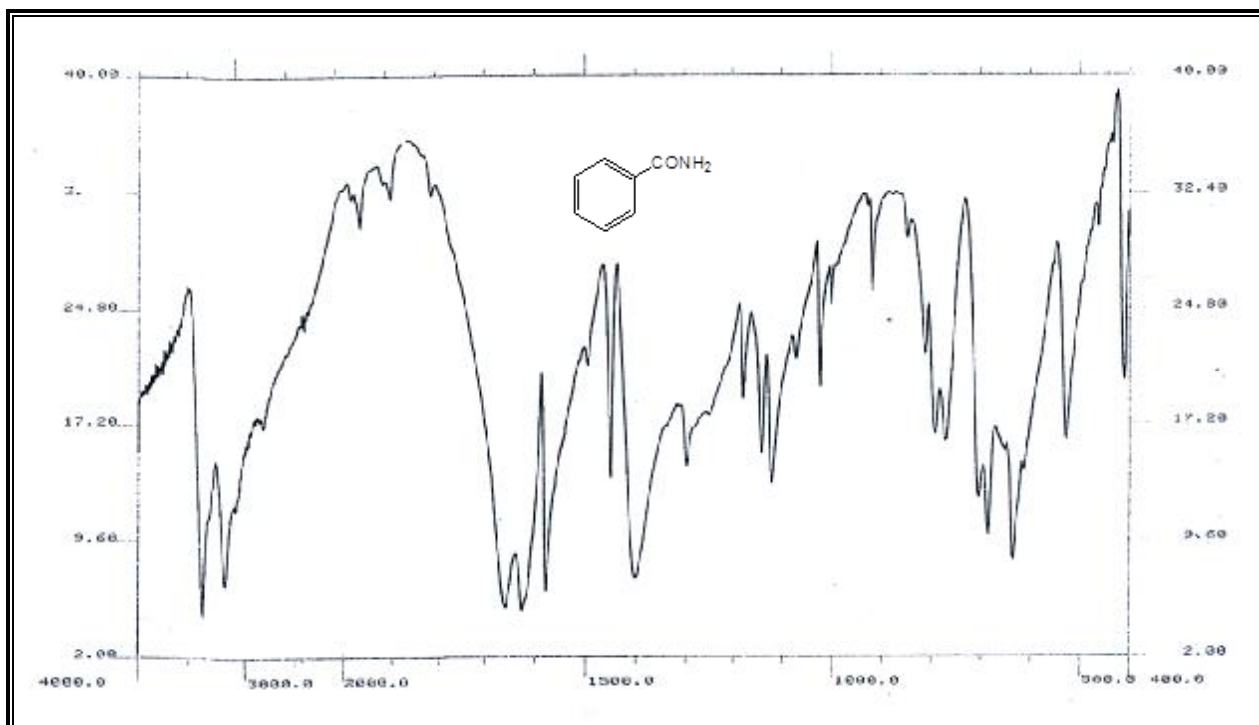

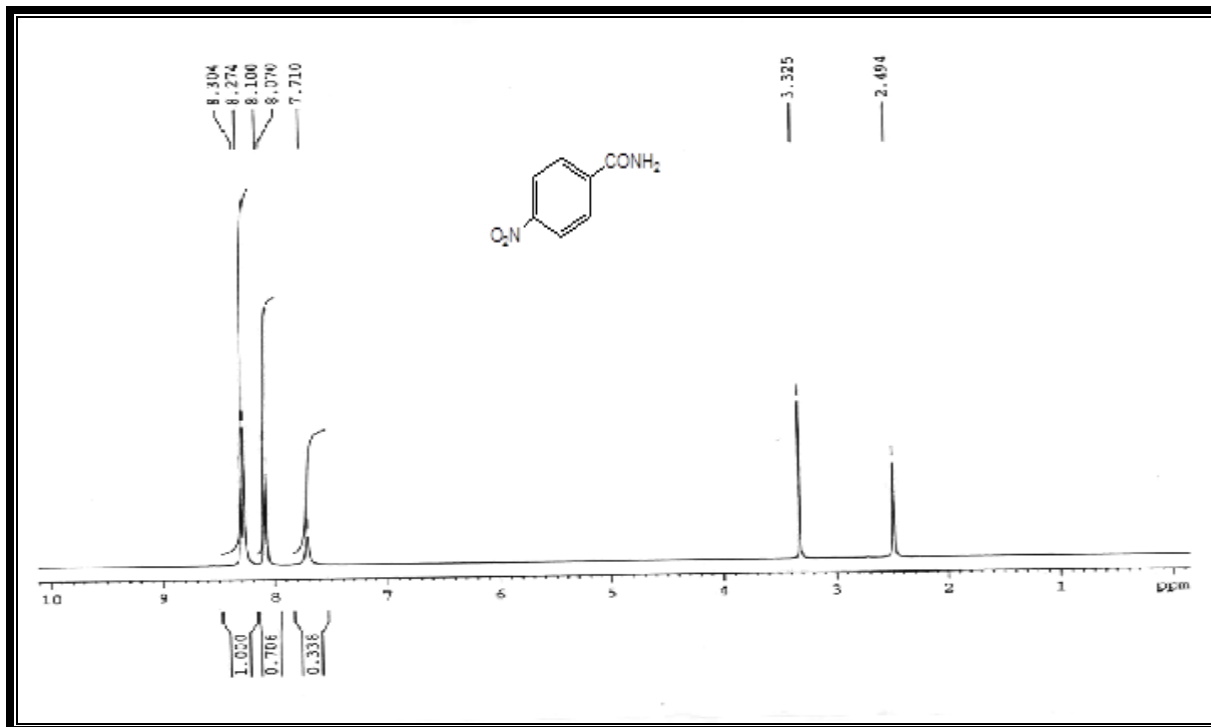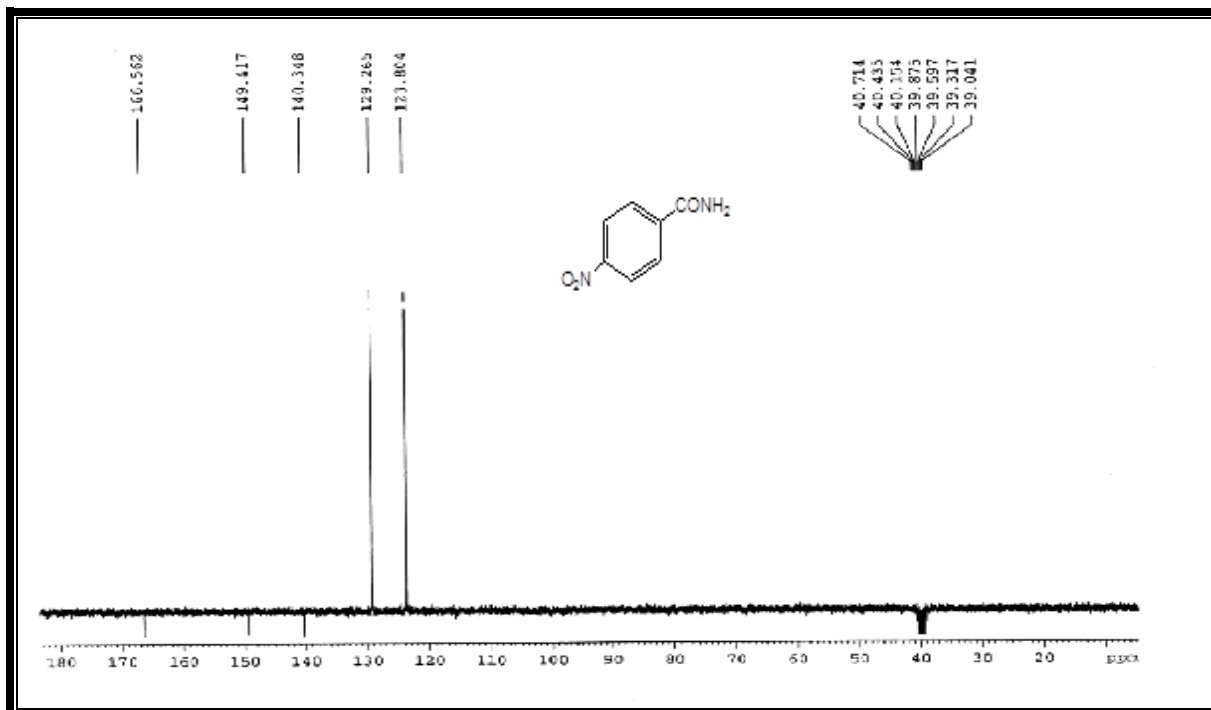

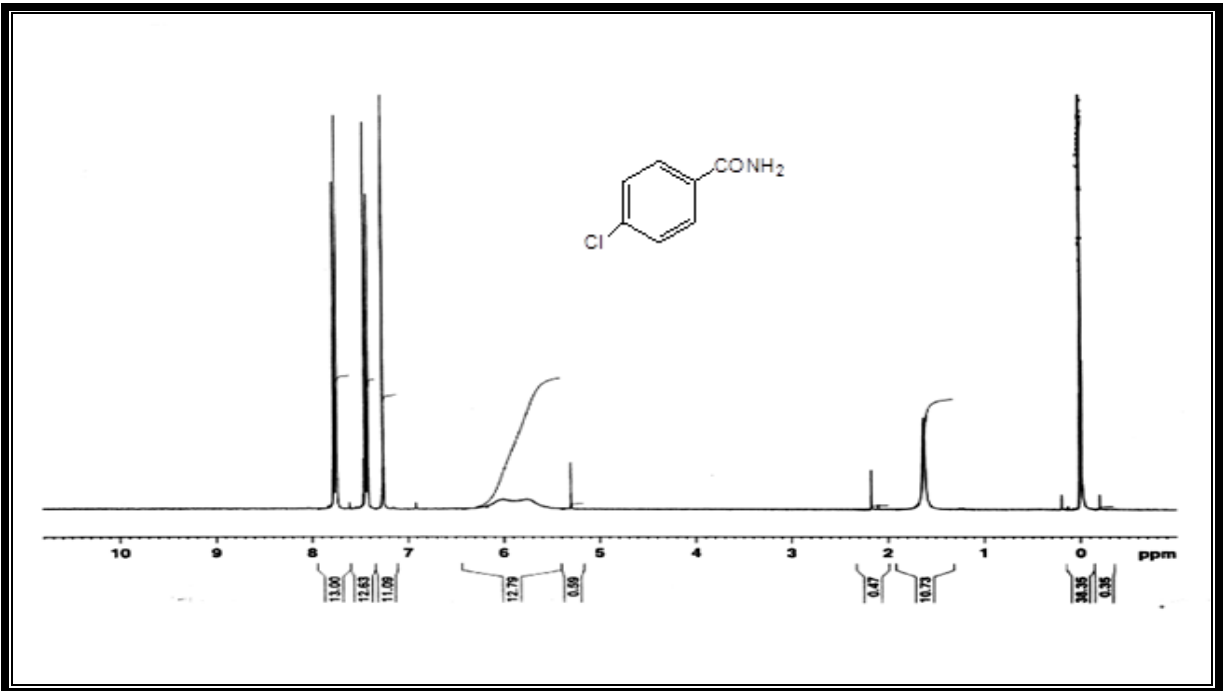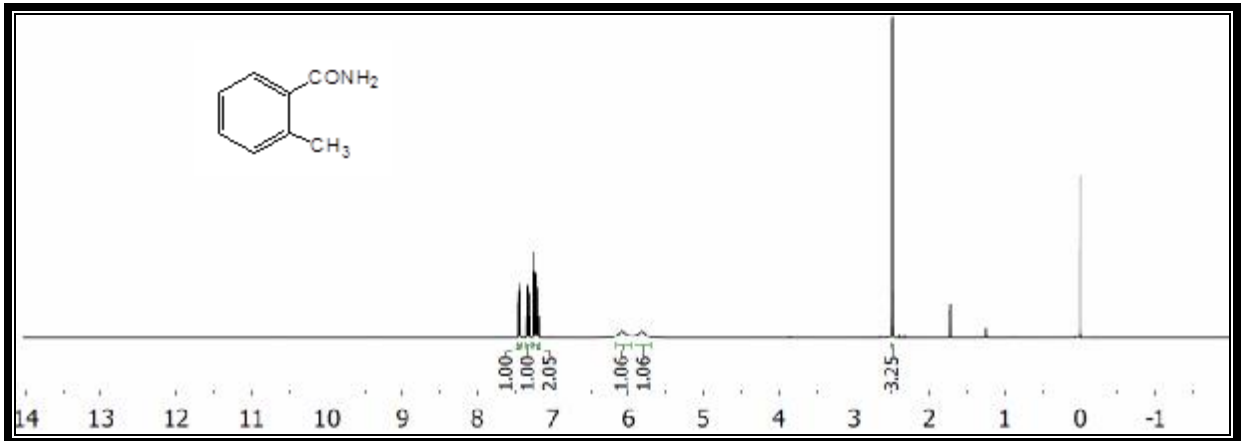

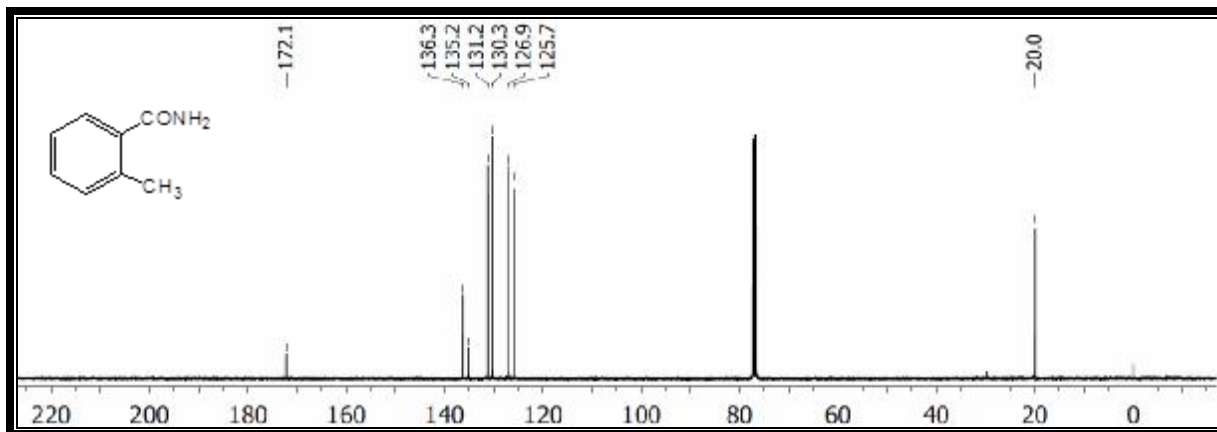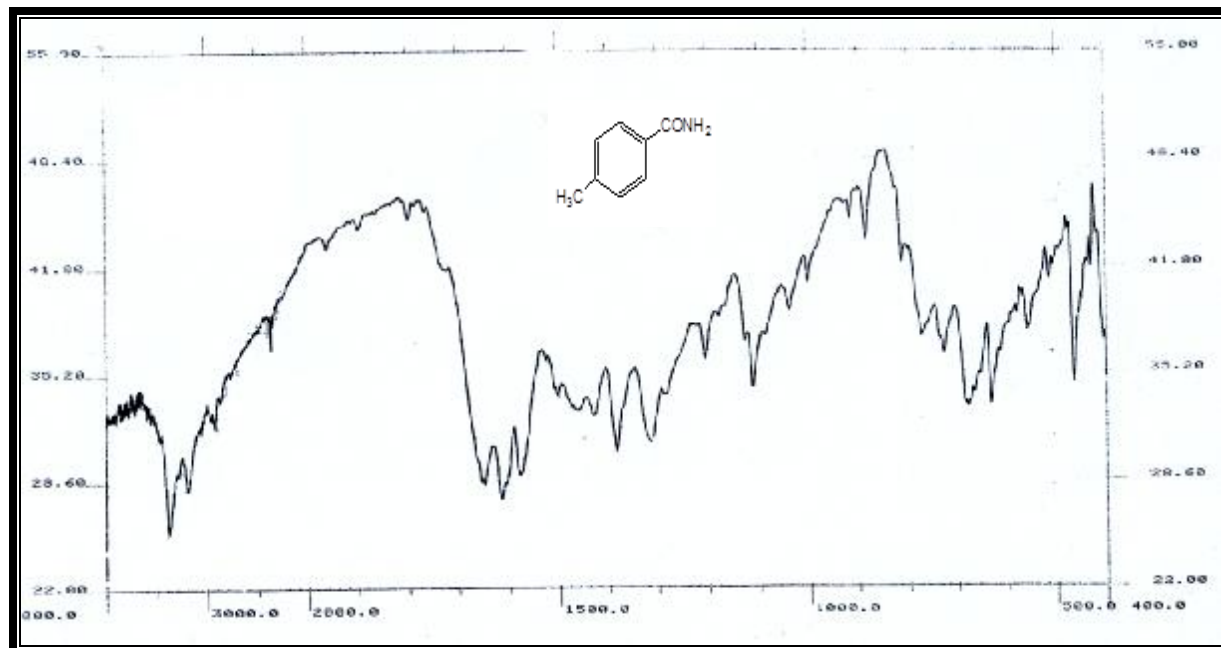

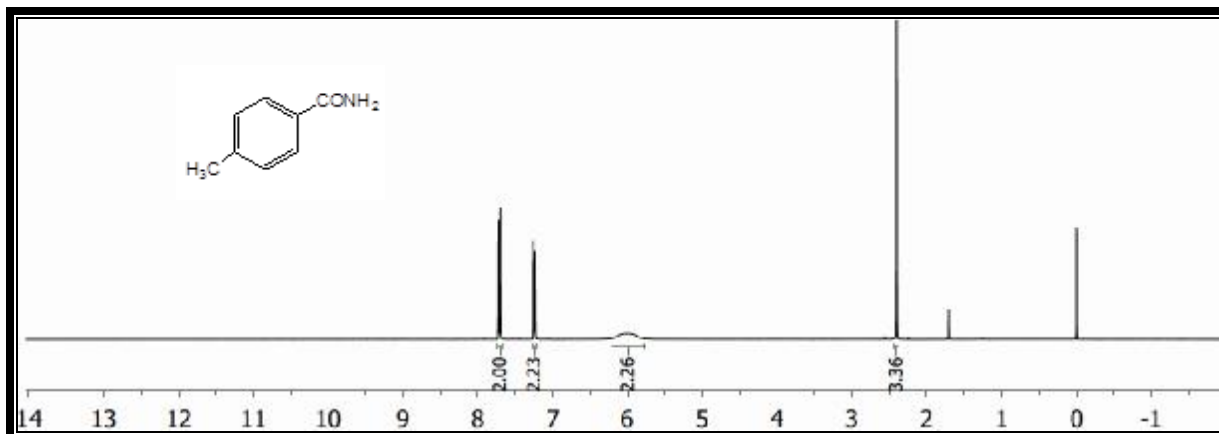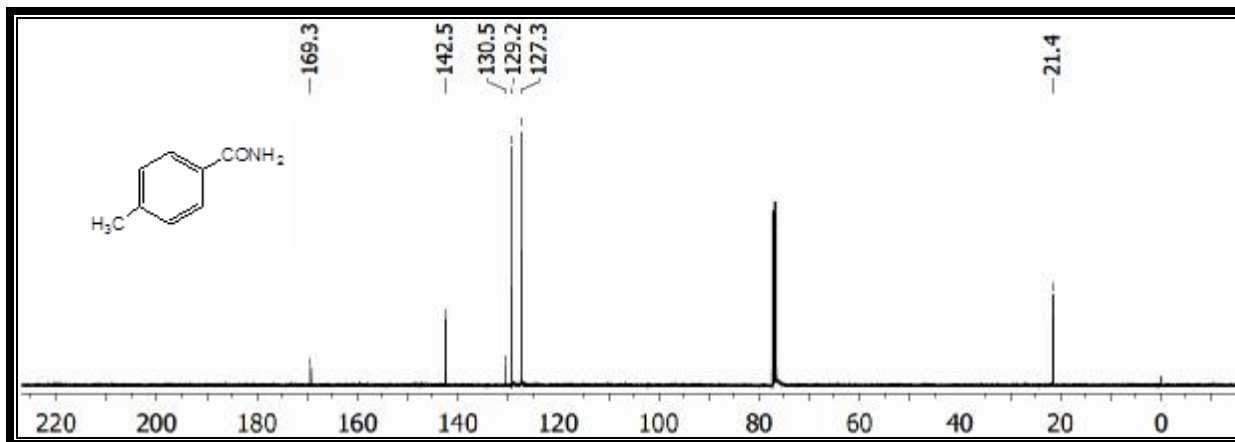

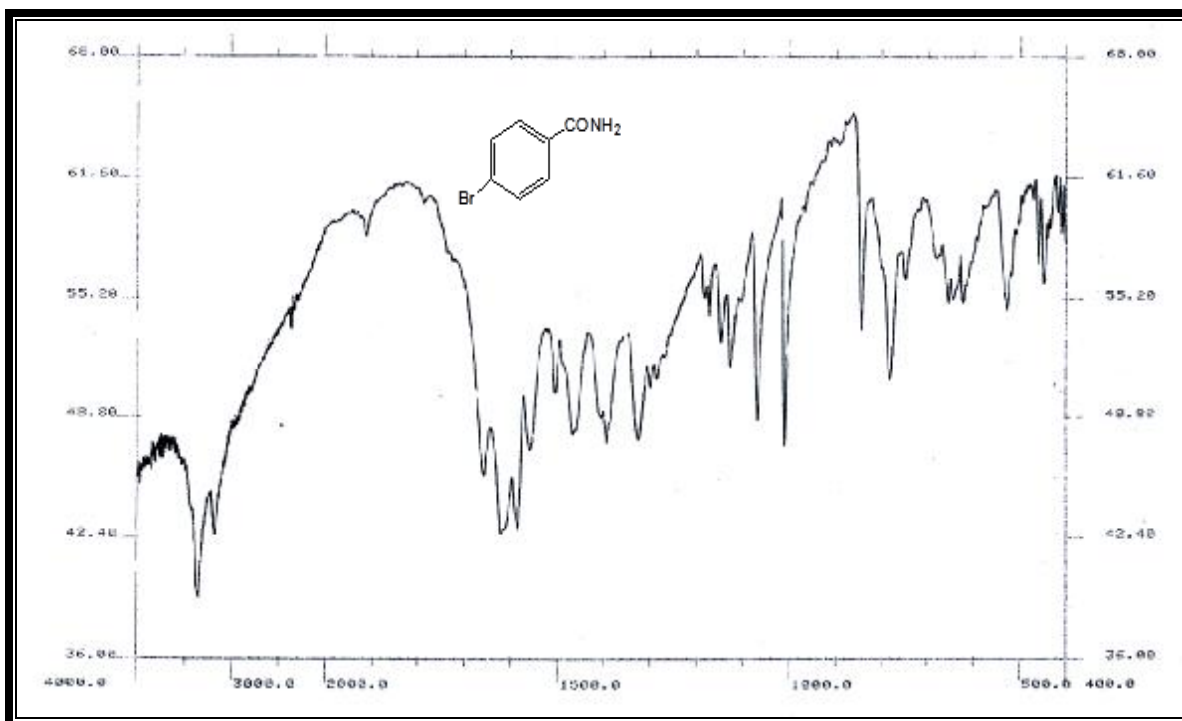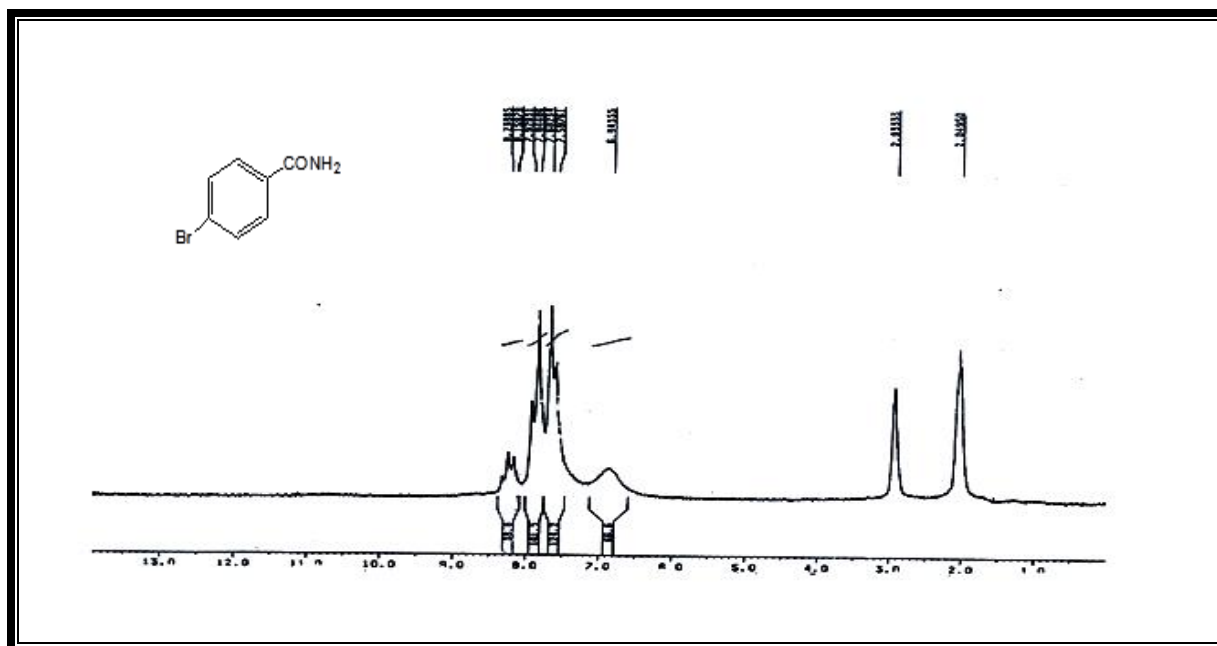

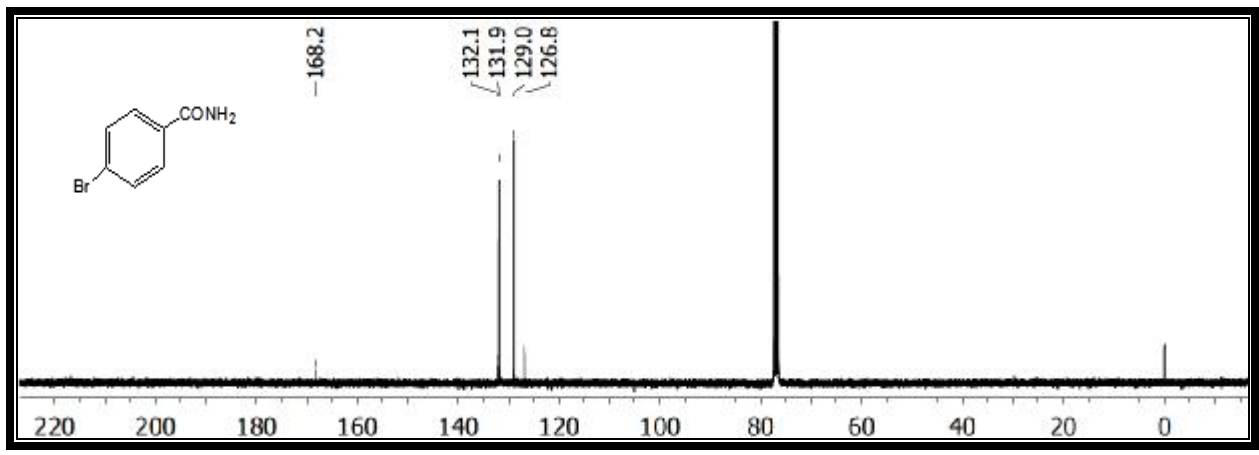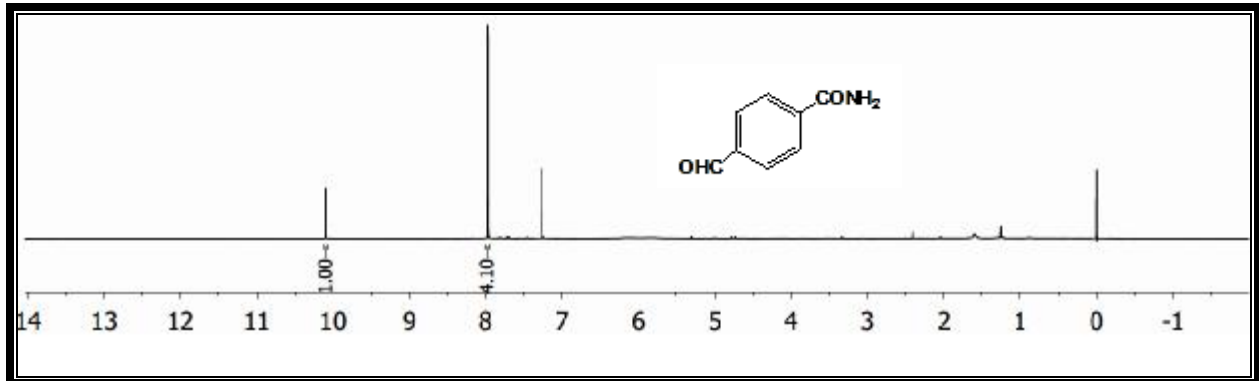



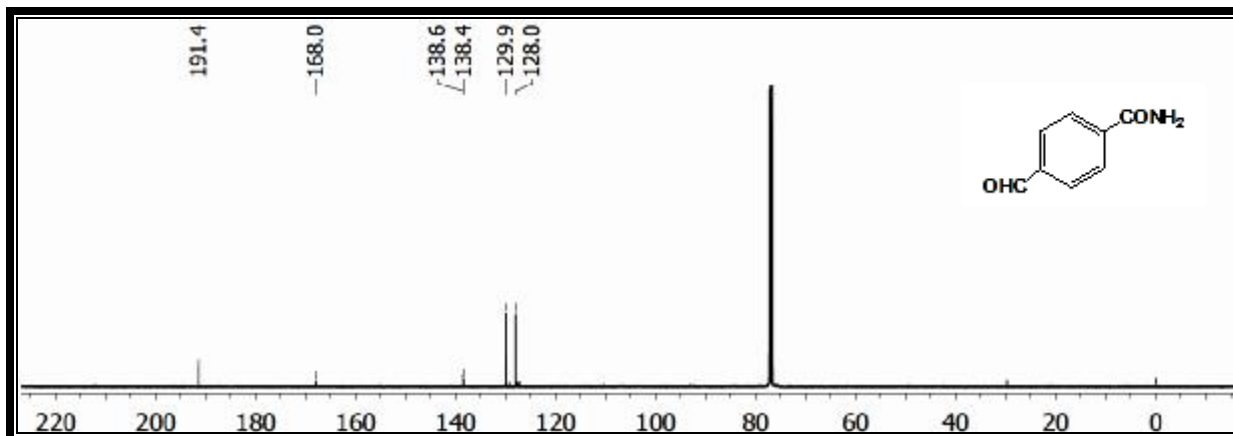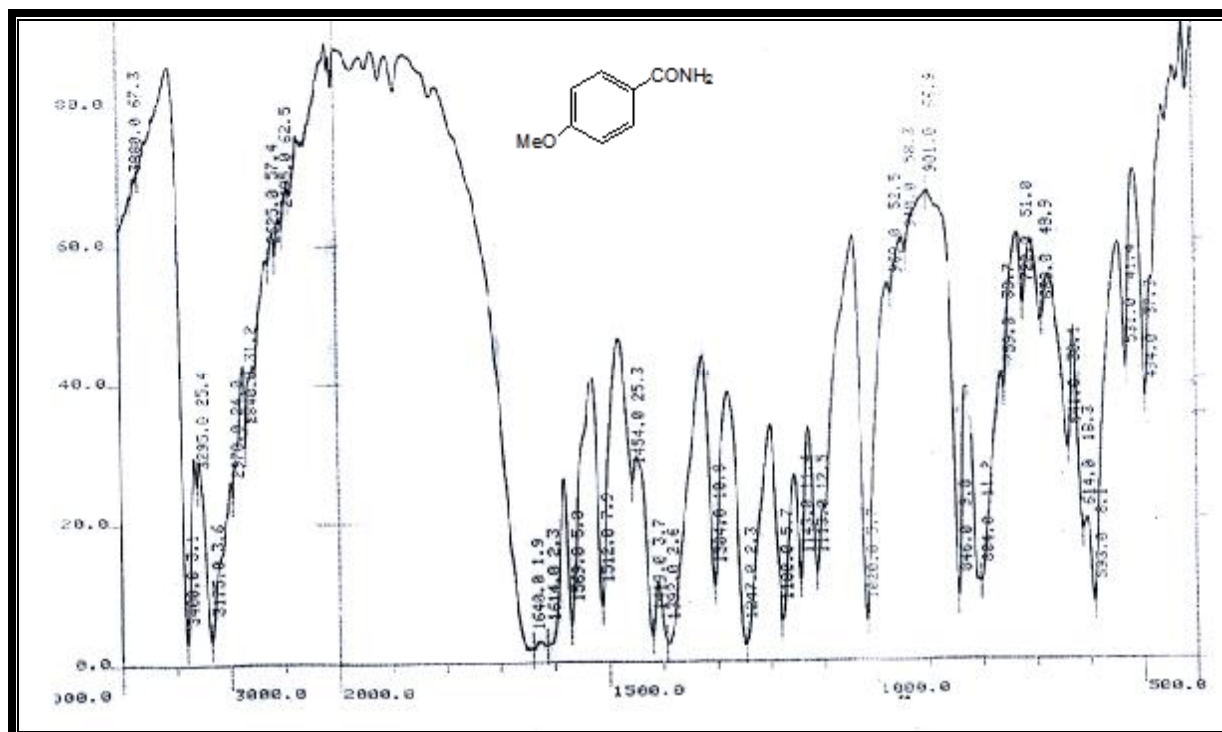

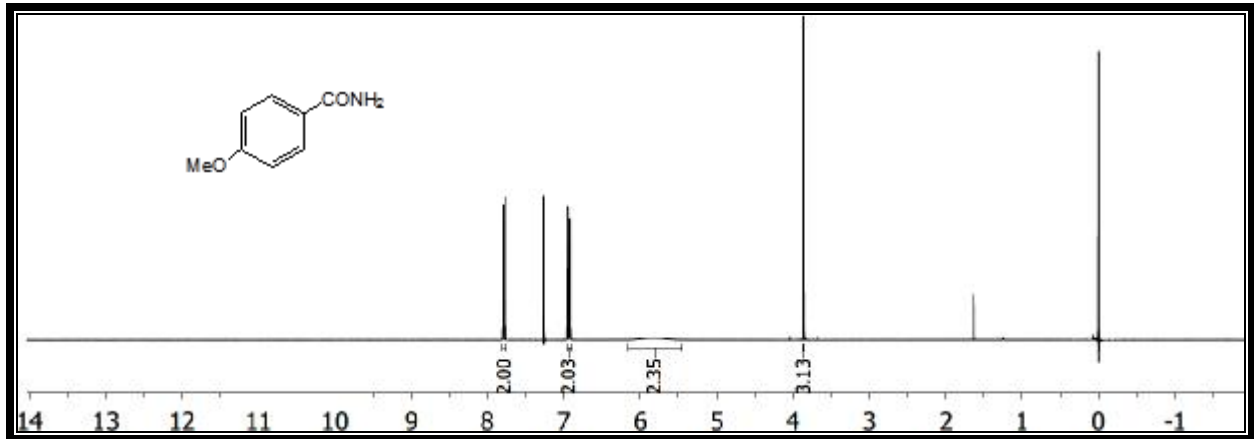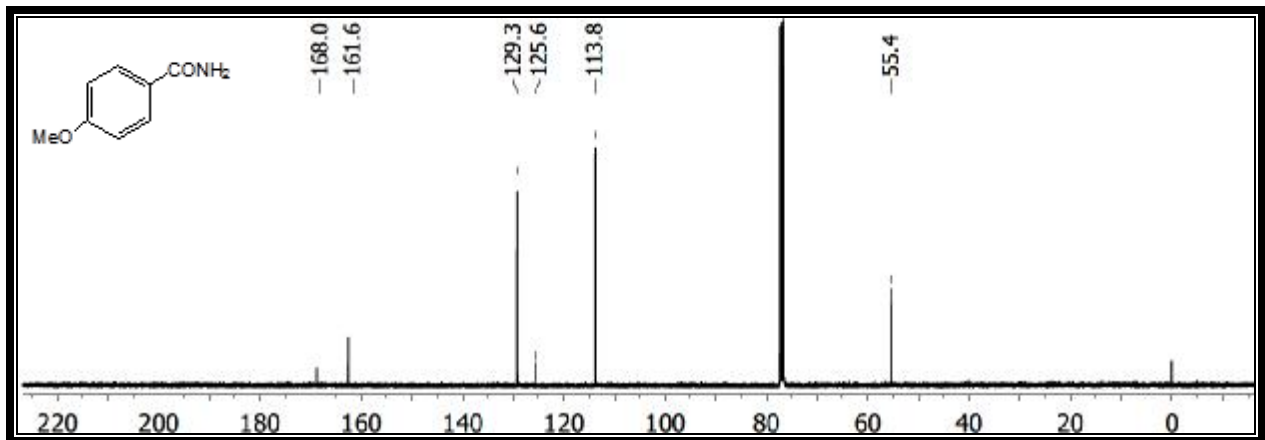

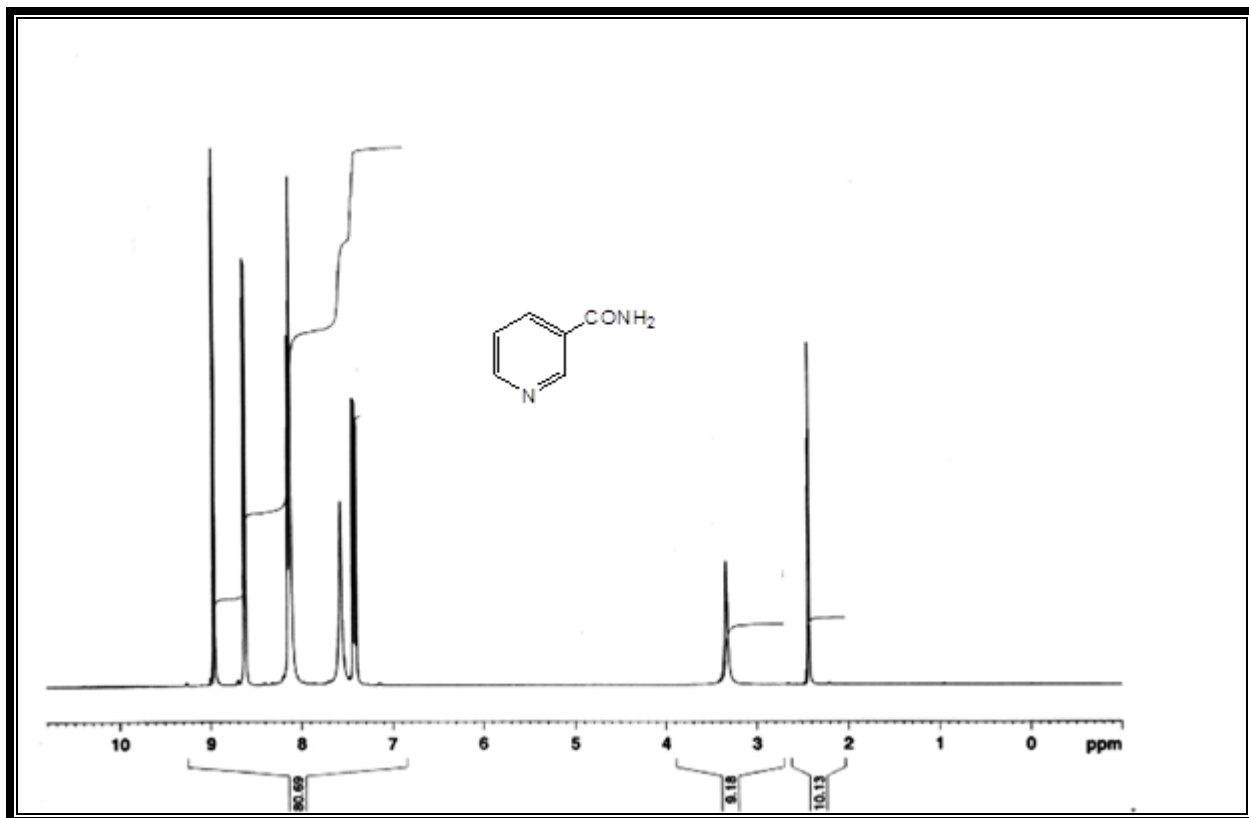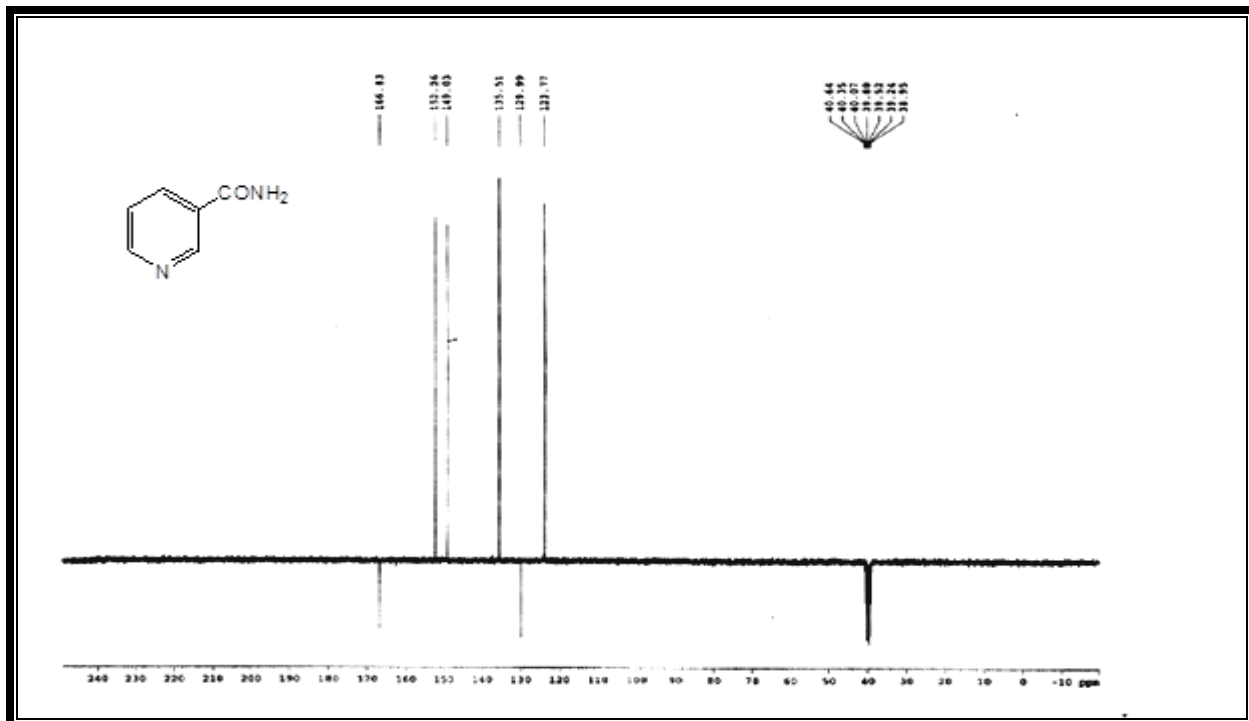

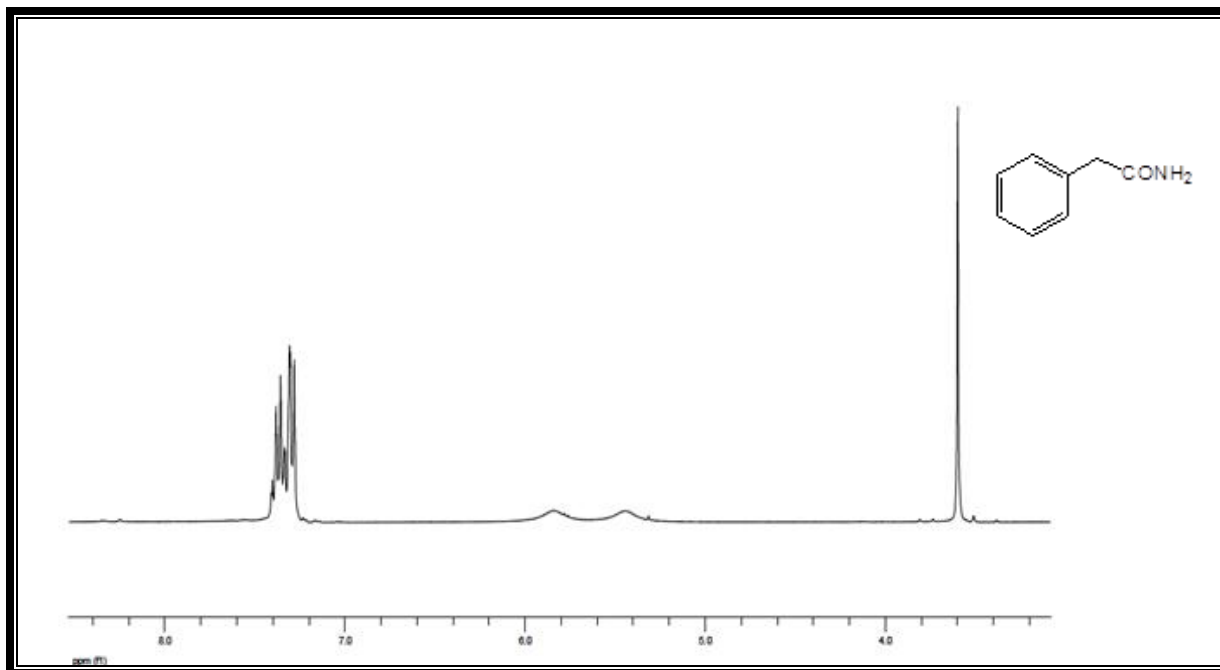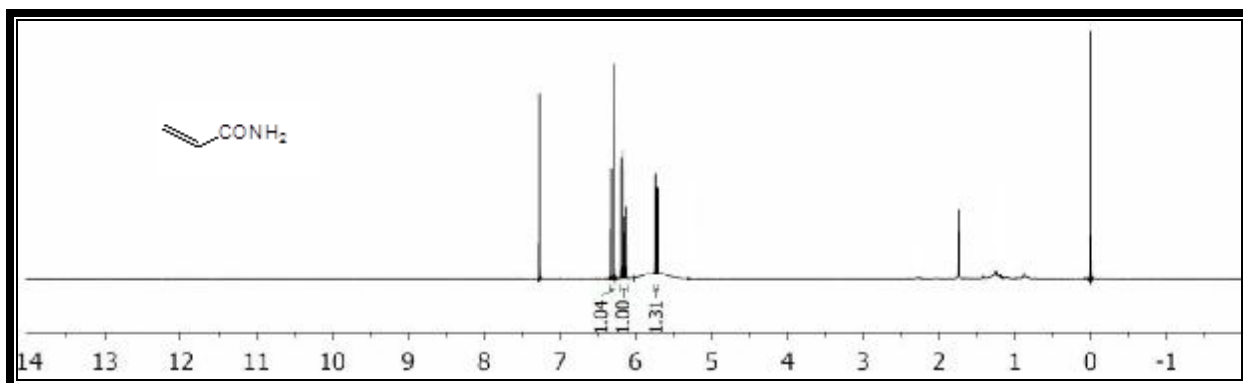

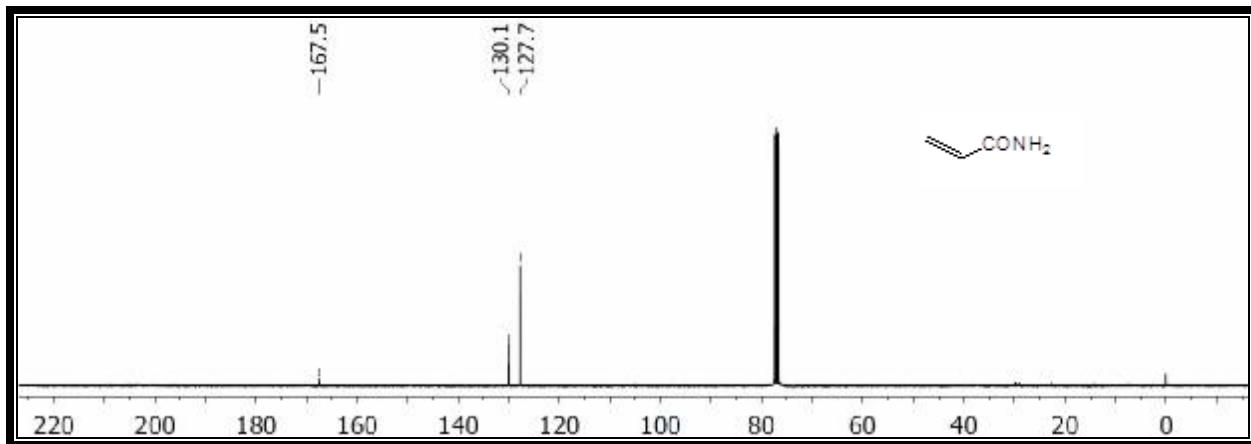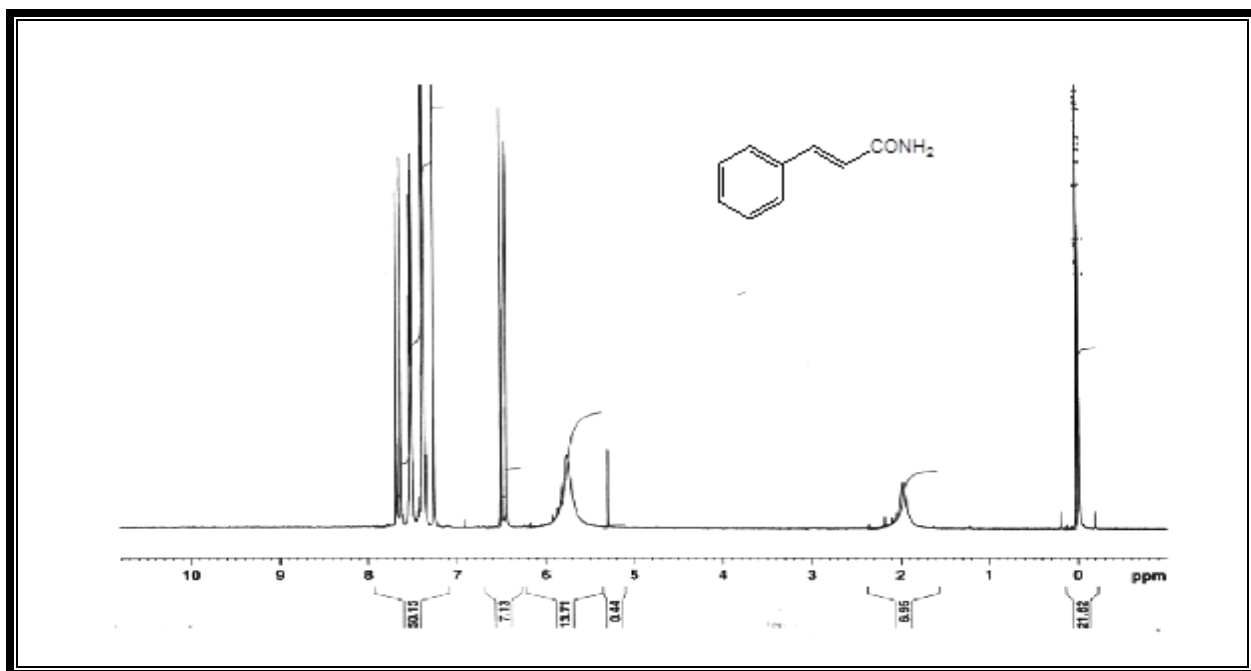

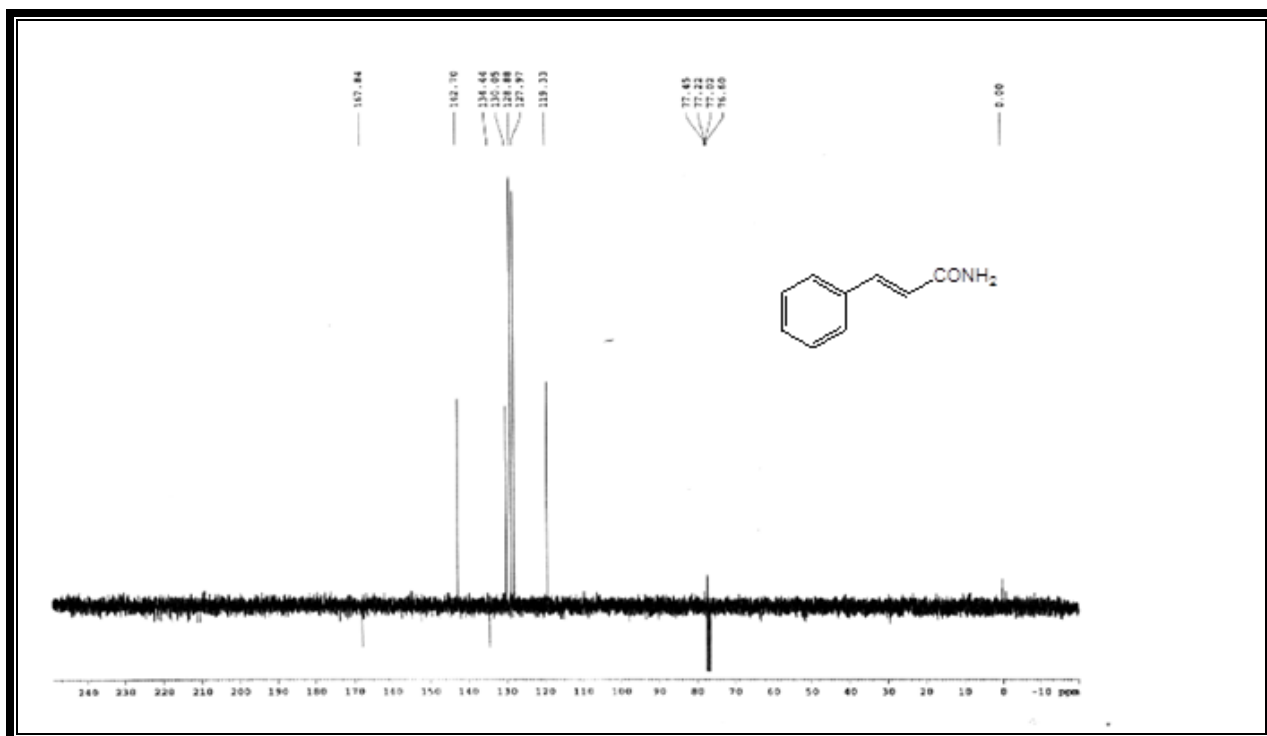

Supplement: c4ra09864a1.pdf [file c4ra09864a1.pdf]
